# Supplementary material for: Assessing Cognitive and Psychomotor Performance in Patients with Fibromyalgia Syndrome
Source: PubMed Central journal article supplement — Pain Ther. 2014 Oct 25;3(2):85–101. doi: 10.1007/s40122-014-0028-0 (PMC4269614; doi:10.1007/s40122-014-0028-0), 2014-10-25
Supplement: 40122_2014_28_MOESM1_ESM.pdf [file 40122_2014_28_MOESM1_ESM.pdf]

- The present study examined the psychomotor and cognitive performance of FMS patients in order to predict their driving ability.
- A total of 43 female patients with FMS were prospectively compared to a historical control group of 129 healthy volunteers.
- The test battery comprised assessments of visual orientation, concentration, attention, vigilance, motor coordination, performance under stress and reaction time.
- The results indicated that the patients' psychomotor and cognitive performances were significantly non-inferior to those of the control group for the majority of the items assessed.

This summary slide represents the opinions of the authors. This study was supported by the KölnFortune Program, Faculty of Medicine, University of Cologne, Cologne, Germany. For a full list of acknowledgments and conflicts of interest for all authors of this article, please see the full text online. Copyright © The Author(s) 2014. Creative Commons Attribution Noncommercial License (CC BY-NC).
